# Supplementary material
Source: MDPI journal article supplement (https://www.mdpi.com/2076-0825/10/11/299)

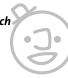

J8

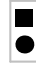

J9

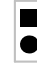

J10

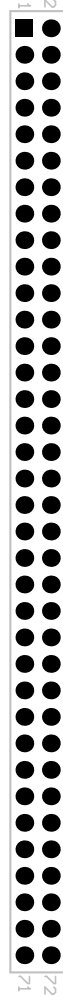

+5V

AIN0  
AIN1  
AIN4

T9CH1

T9CH2

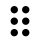

J11

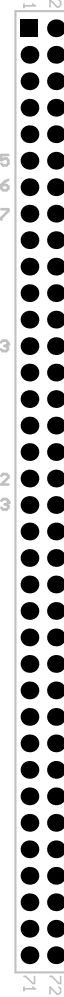AIN5  
AIN6  
AIN7

T2CH3

AIN2  
AIN3

T2CH4

AIN7  
AIN6  
AIN5  
AIN4

J5

AIN3  
AIN2  
AIN1AIN0  
PWM15  
PWM14

J4

PWM13  
PWM12  
PWM11

J3

PWM10  
PWM9  
PWM8

J2

PWM7  
PWM6  
PWM5

J1

PWM4  
PWM3  
PWM2PWM1  
PWM0  
AOUT3

J6

AOUT2  
AOUT1  
AOUT0

J7

AOUT3  
AOUT2  
AOUT1  
AOUT0

J8

AOUT3  
AOUT2  
AOUT1  
AOUT0

J9

AOUT3  
AOUT2  
AOUT1  
AOUT0

J10

AOUT3  
AOUT2  
AOUT1  
AOUT0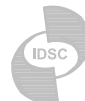

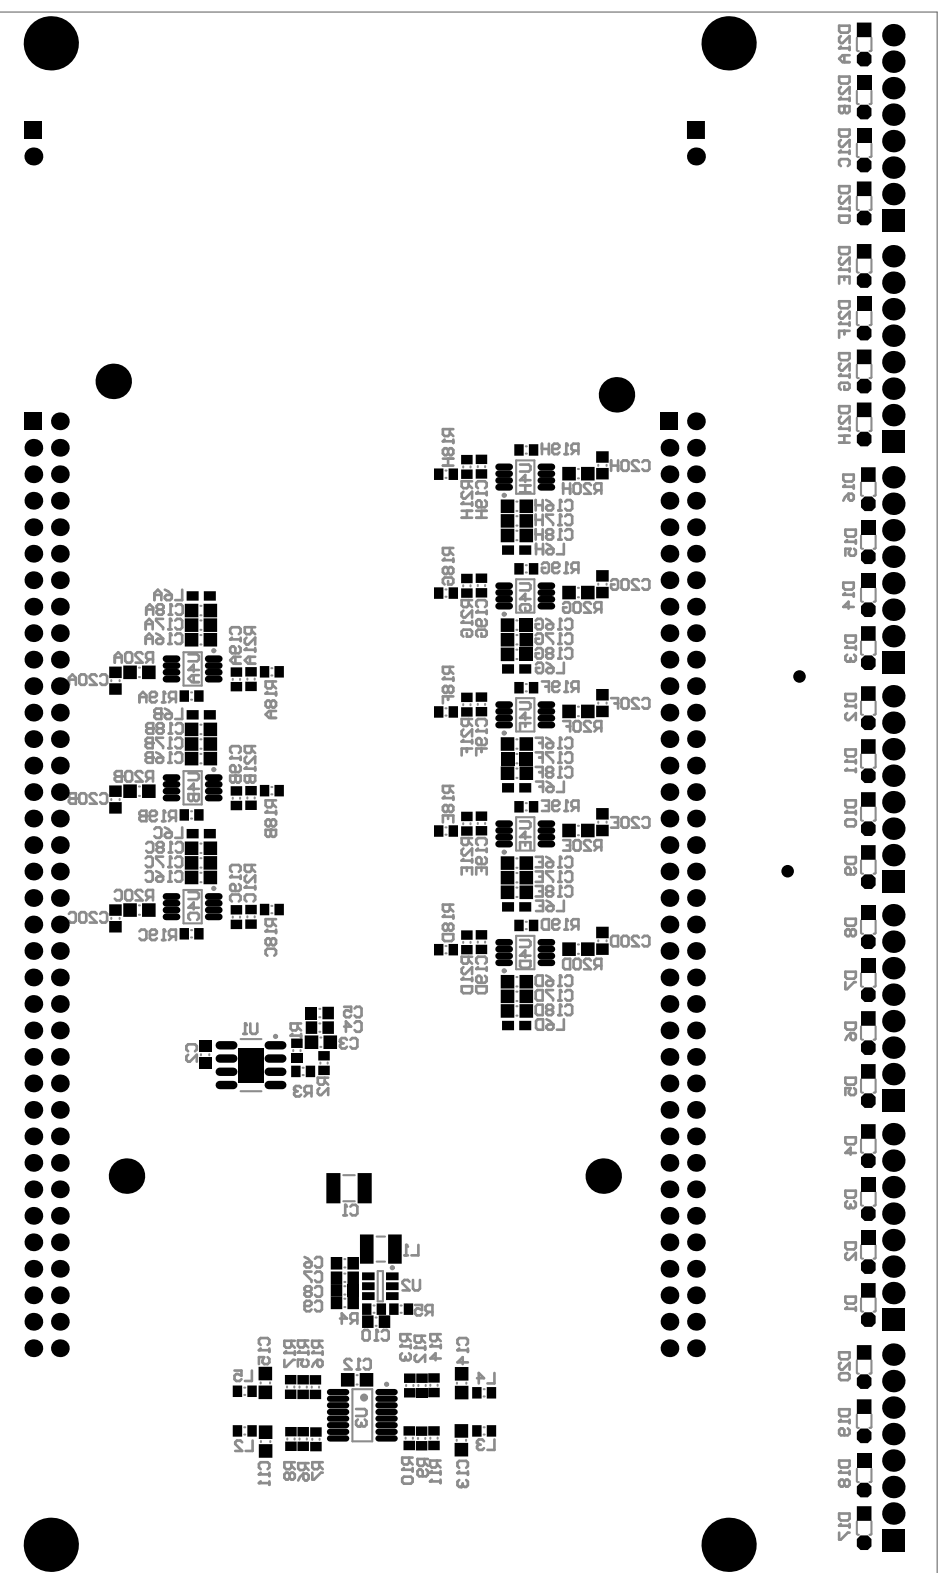

Supplement: s1 [file s1]
