# Supplementary material
Source: MDPI journal article supplement (https://www.mdpi.com/2076-0825/10/11/299)
Supplement: s1 [file s1]

Layer Stack Legend

| Material         | Layer            | Thickness | Dielectric Material | Type        | Gerber |
|------------------|------------------|-----------|---------------------|-------------|--------|
|                  | Top Overlay      |           |                     | Legend      | GTO    |
|                  | Surface Material | 0.02mm    | Solder Resist       | Solder Mask | GTS    |
| Copper           | Top Copper       | 0.04mm    |                     | Signal      | GTL    |
| Prepreg          |                  | 0.20mm    | 7628                | Dielectric  |        |
| Copper           | PowerPlane       | 0.02mm    |                     | Signal      | G1     |
| Core             |                  | 1.06mm    | FR-4                | Dielectric  |        |
| Copper           | GNDPlane         | 0.02mm    |                     | Signal      | G2     |
| Prepreg          |                  | 0.20mm    | 7628                | Dielectric  |        |
| Copper           | Bottom Copper    | 0.04mm    |                     | Signal      | GBL    |
| Surface Material | Bottom Mask      | 0.02mm    | Solder Resist       | Solder Mask | GBS    |
|                  | Bottom Overlay   |           |                     | Legend      | GBO    |

Total thickness: 1.60mm
