# Supplementary material
Source: MDPI journal article supplement (https://www.mdpi.com/2076-0825/10/11/299)
Supplement: s1 [file s1]

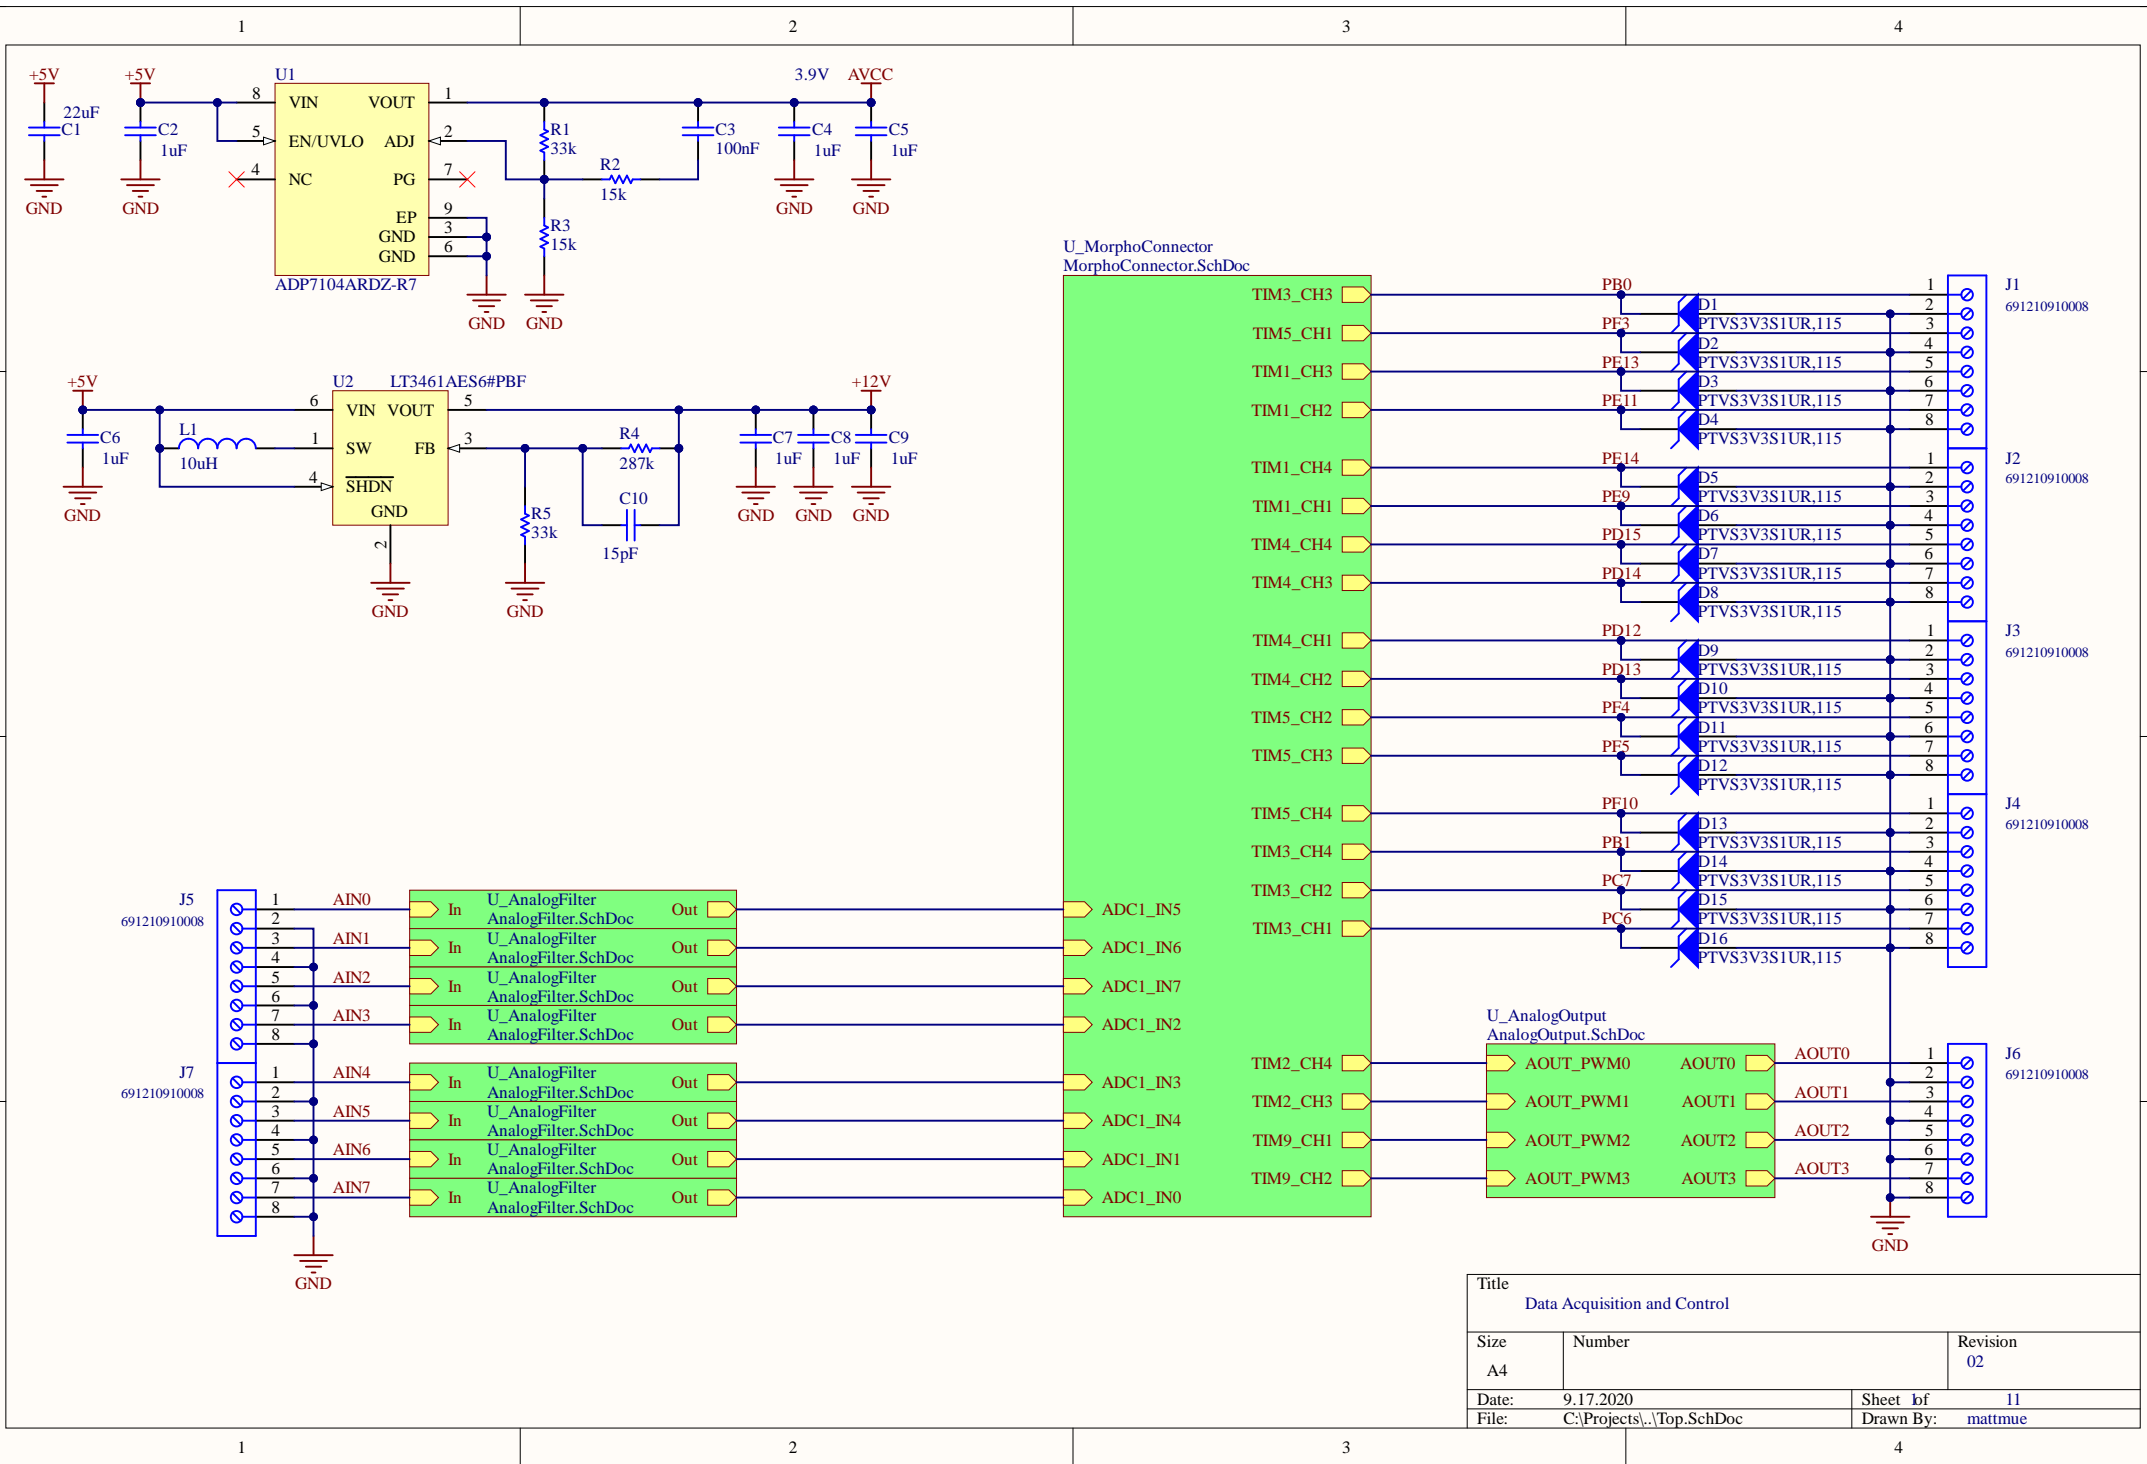

|                              |                            |                   |
|------------------------------|----------------------------|-------------------|
| Title                        |                            |                   |
| Data Acquisition and Control |                            |                   |
| Size                         | Number                     | Revision          |
| A4                           |                            | 02                |
| Date:                        | 9.17.2020                  | Sheet of 11       |
| File:                        | C:\Projects\...\Top.SchDoc | Drawn By: mattmue |



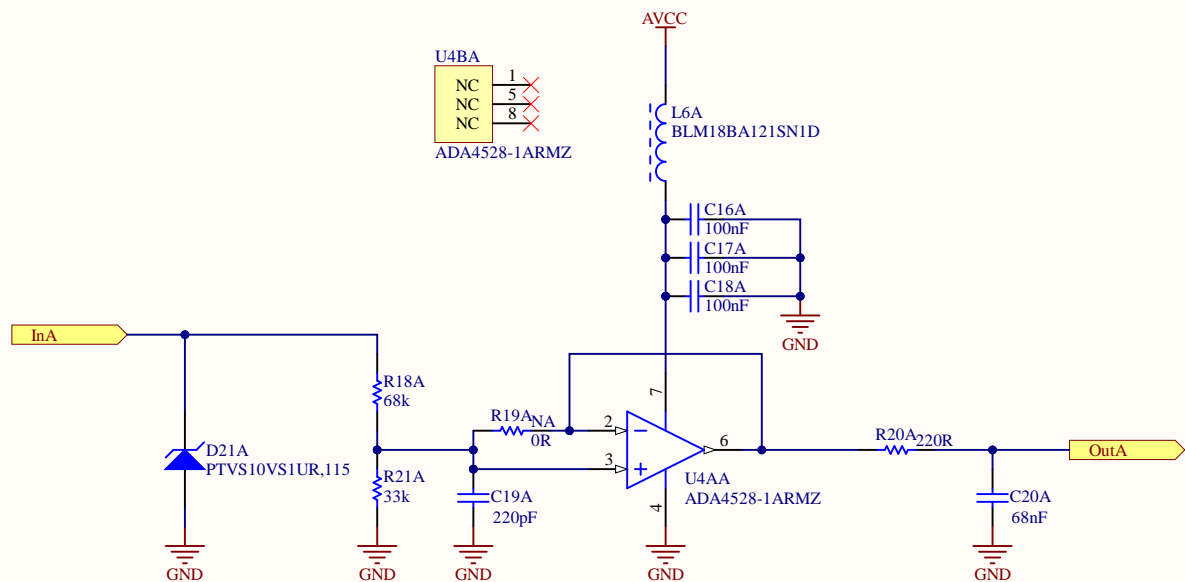

|                              |                                     |                   |
|------------------------------|-------------------------------------|-------------------|
| Title                        |                                     |                   |
| Data Acquisition and Control |                                     |                   |
| Size                         | Number                              | Revision          |
| A4                           |                                     | 01                |
| Date:                        | 9.17.2020                           | Sheet 3 of 11     |
| File:                        | C:\Projects\...\AnalogFilter.SchDoc | Drawn By: mattmue |

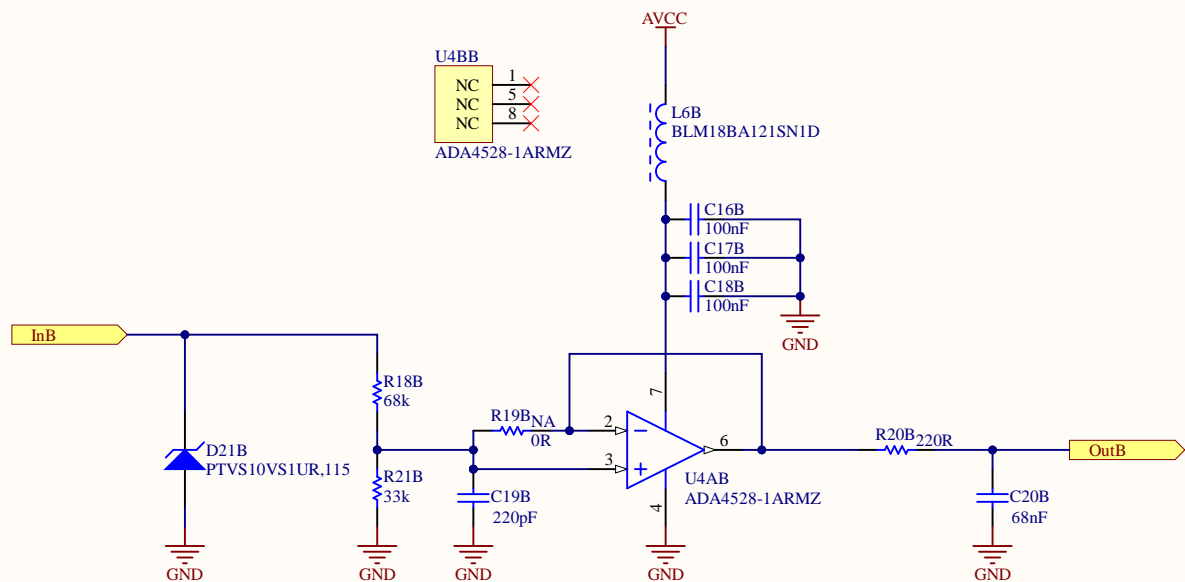

|                                       |                                     |               |                |
|---------------------------------------|-------------------------------------|---------------|----------------|
| Title<br>Data Acquisition and Control |                                     |               |                |
| Size<br>A4                            | Number                              |               | Revision<br>01 |
| Date:                                 | 9.17.2020                           | Sheet 3 of 11 |                |
| File:                                 | C:\Projects\...\AnalogFilter.SchDoc | Drawn By:     | mattmue        |

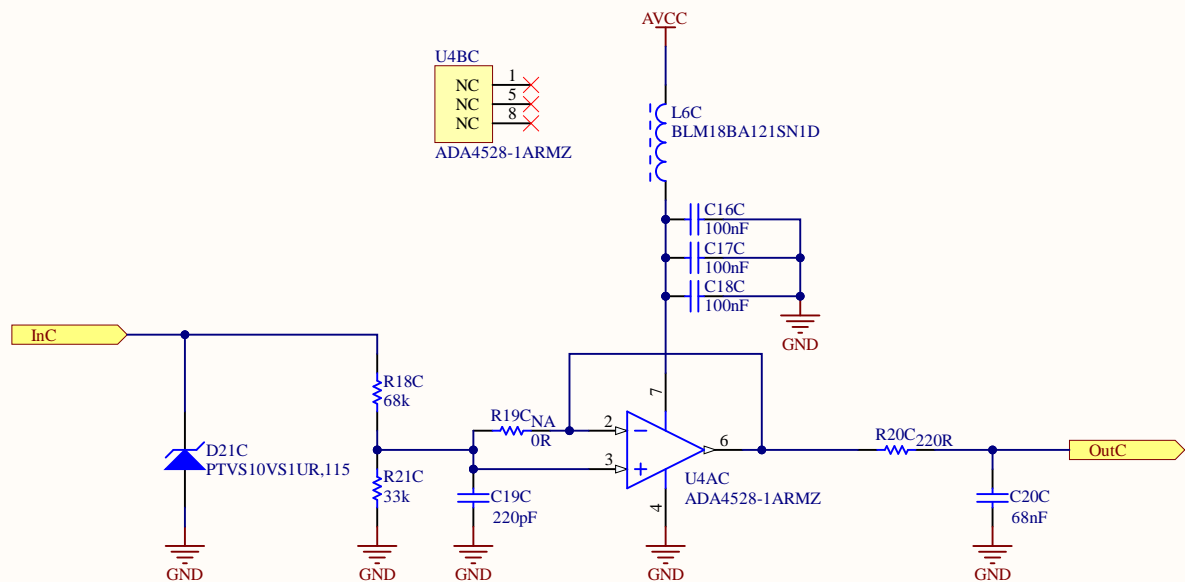

|                              |                                     |                   |
|------------------------------|-------------------------------------|-------------------|
| Title                        |                                     |                   |
| Data Acquisition and Control |                                     |                   |
| Size                         | Number                              | Revision          |
| A4                           |                                     | 01                |
| Date:                        | 9.17.2020                           | Sheet 3 of 11     |
| File:                        | C:\Projects\...\AnalogFilter.SchDoc | Drawn By: mattmue |

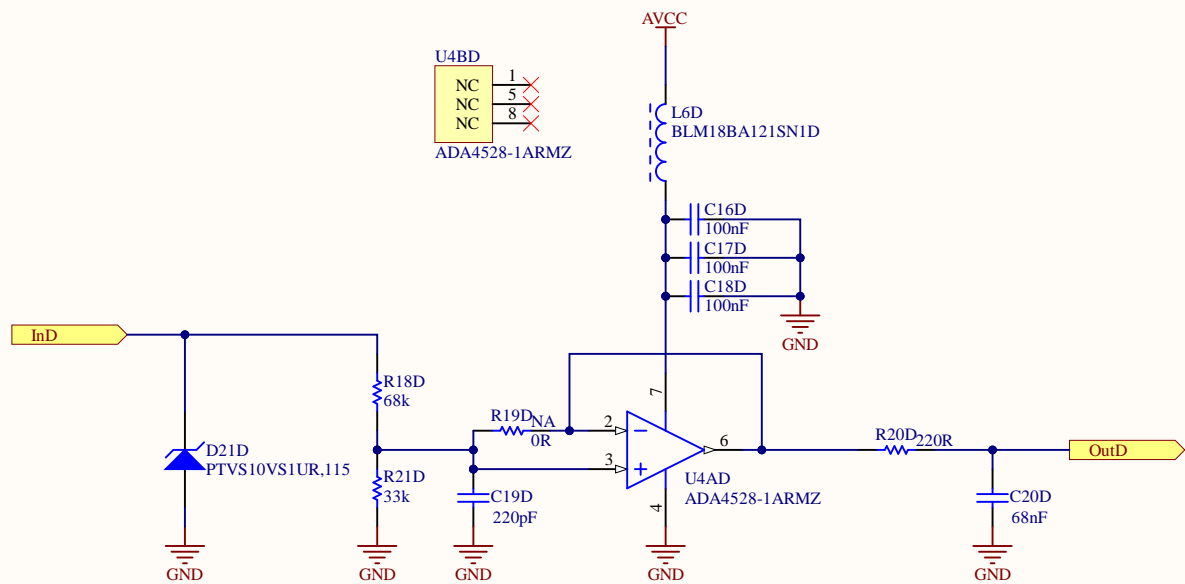

|                                       |                                     |           |                |
|---------------------------------------|-------------------------------------|-----------|----------------|
| Title<br>Data Acquisition and Control |                                     |           |                |
| Size<br>A4                            | Number                              |           | Revision<br>01 |
| Date:                                 | 9.17.2020                           | Sheet 34  | 11             |
| File:                                 | C:\Projects\...\AnalogFilter.SchDoc | Drawn By: | mattmue        |

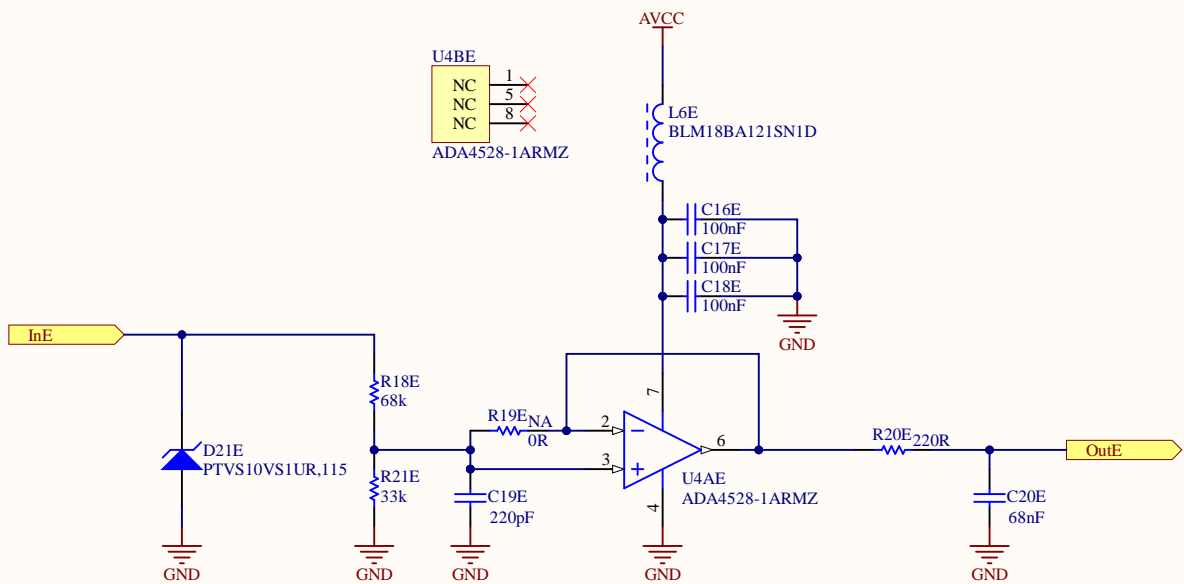

|                                              |           |                |
|----------------------------------------------|-----------|----------------|
| Title<br>Data Acquisition and Control        |           |                |
| Size<br>A4                                   | Number    | Revision<br>01 |
| Date:<br>9.17.2020                           | Sheet 36  | 11             |
| File:<br>C:\Projects\...\AnalogFilter.SchDoc | Drawn By: | mattmue        |





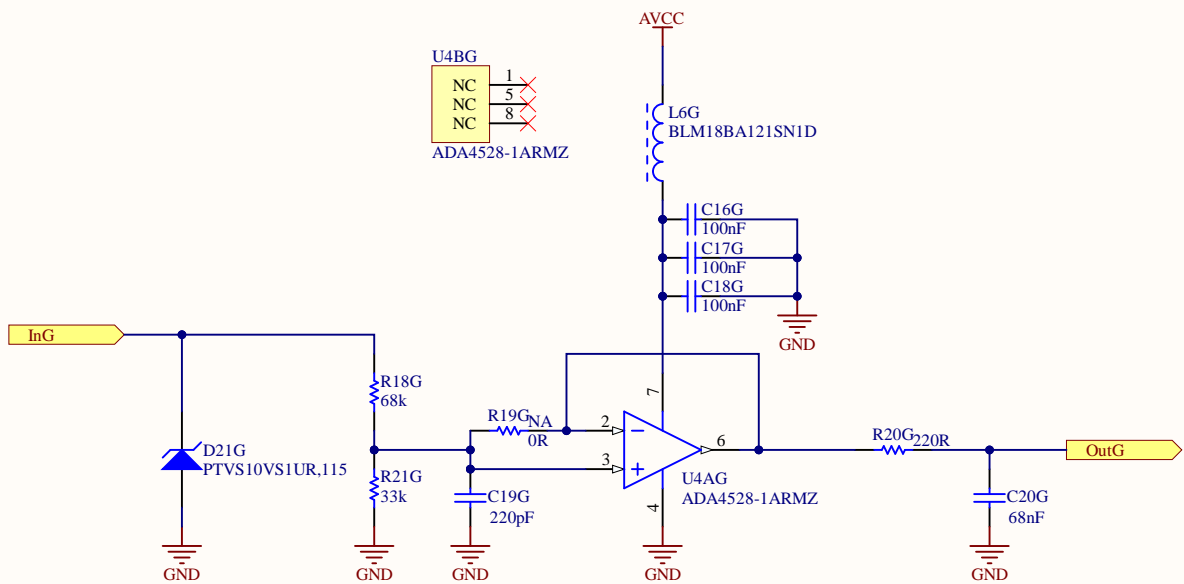

U4BG  
 NC 1  
 NC 5  
 NC 8  
 ADA4528-1ARMZ

|                              |                                     |                   |
|------------------------------|-------------------------------------|-------------------|
| Title                        |                                     |                   |
| Data Acquisition and Control |                                     |                   |
| Size                         | Number                              | Revision          |
| A4                           |                                     | 01                |
| Date:                        | 9.17.2020                           | Sheet 3 of 11     |
| File:                        | C:\Projects\...\AnalogFilter.SchDoc | Drawn By: mattmue |

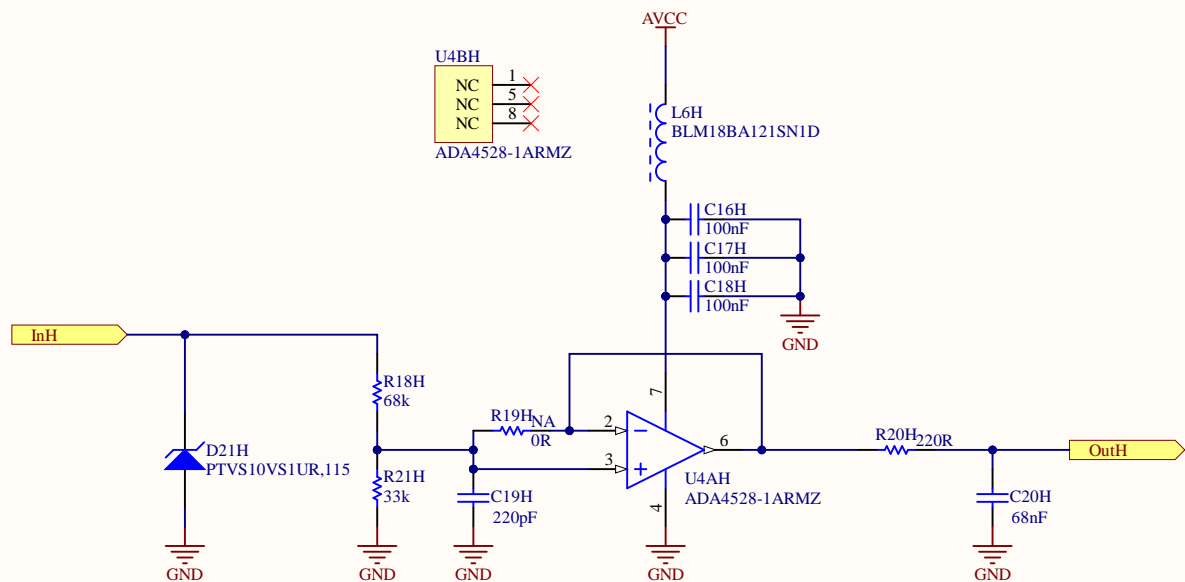

|                              |                                     |                   |
|------------------------------|-------------------------------------|-------------------|
| Title                        |                                     |                   |
| Data Acquisition and Control |                                     |                   |
| Size                         | Number                              | Revision          |
| A4                           |                                     | 01                |
| Date:                        | 9.17.2020                           | Sheet 38 11       |
| File:                        | C:\Projects\...\AnalogFilter.SchDoc | Drawn By: mattmue |

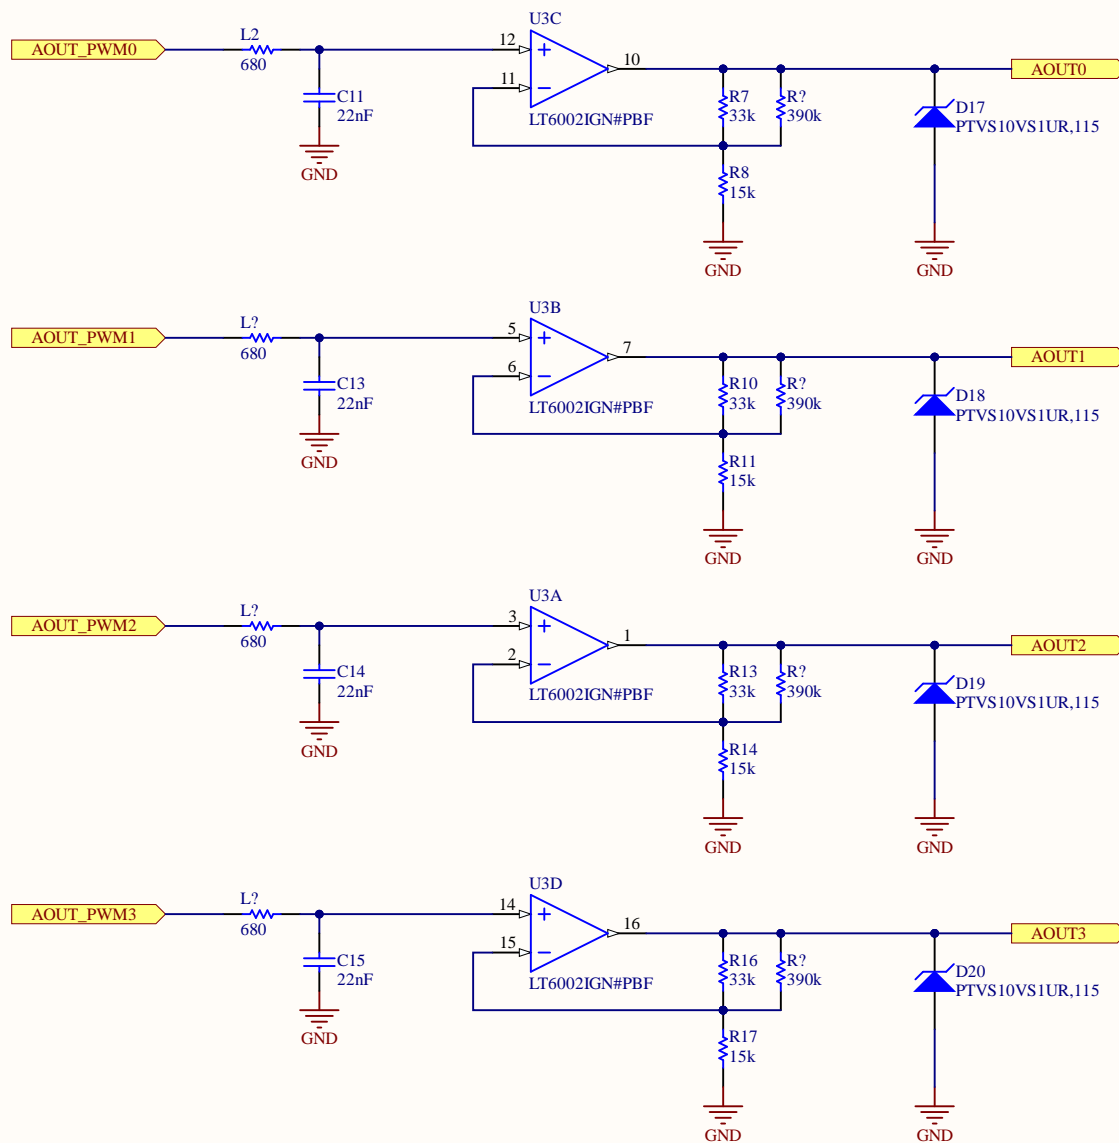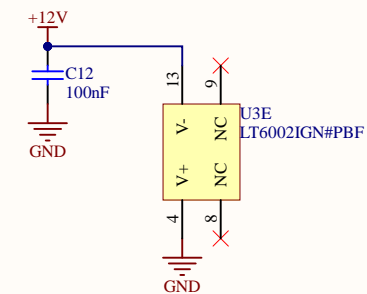

|                                       |                                     |            |                |
|---------------------------------------|-------------------------------------|------------|----------------|
| Title<br>Data Acquisition and Control |                                     |            |                |
| Size<br>A4                            | Number                              |            | Revision<br>02 |
| Date:                                 | 9.17.2020                           | Sheet 4 of | 11             |
| File:                                 | C:\Projects\...\AnalogOutput.SchDoc | Drawn By:  | mattmue        |
